# Supplementary material for: Regulation, Function, and Dysregulation of Endocannabinoids in Models of Adipose and β-Pancreatic Cells and in Obesity and Hyperglycemia
Source: Oxford University Press journal article supplement (doi:10.1210/jc.2005-2679), 2006-05-10

### **Supplemental Figure 1. Adipocyte- $\beta$ -cell communication in obesity and hyperglycaemia: possible disruption by the endocannabinoids**

According to the experiments carried out in the present study with models of adipocytes and  $\beta$ -cells, high serum glucose levels cause endocannabinoid (EC) release from  $\beta$  cells. Under conditions of obesity and pre-diabetes, insulin, instead of inhibiting glucose-induced EC elevation, stimulates EC levels *per se*. The subsequent up-regulation of EC levels causes, via CB<sub>1</sub> receptors, further release of insulin from  $\beta$  cells. A vicious circle is therefore established in  $\beta$  cells whereby ever increasing EC and insulin amounts are produced from these cells. Excess insulin and EC accelerate adipocyte differentiation and causes the formation of hypertrophic adipocytes, which carry on producing ECs. Excess ECs from both  $\beta$ -cells and adipocytes inhibit, via CB<sub>1</sub> receptors, adiponectin expression while keeping on stimulating insulin release and, through these two actions, contribute to reduce insulin sensitivity and increase hyperglycaemia, thereby establishing another vicious circle including hypertrophic adipocytes,  $\beta$ -cells and other insulin-sensitive and glucose-utilizing cells. Blockade of CB<sub>1</sub> receptors, by increasing adiponectin production and inhibiting EC-induced insulin release from  $\beta$ -cells, interrupts these vicious circles, thereby causing beneficial effects that are independent from body weight loss.

Broken arrows denote inhibition, full arrows denote activation. Crossed circles denote processes that are blocked by CB<sub>1</sub> receptor antagonists

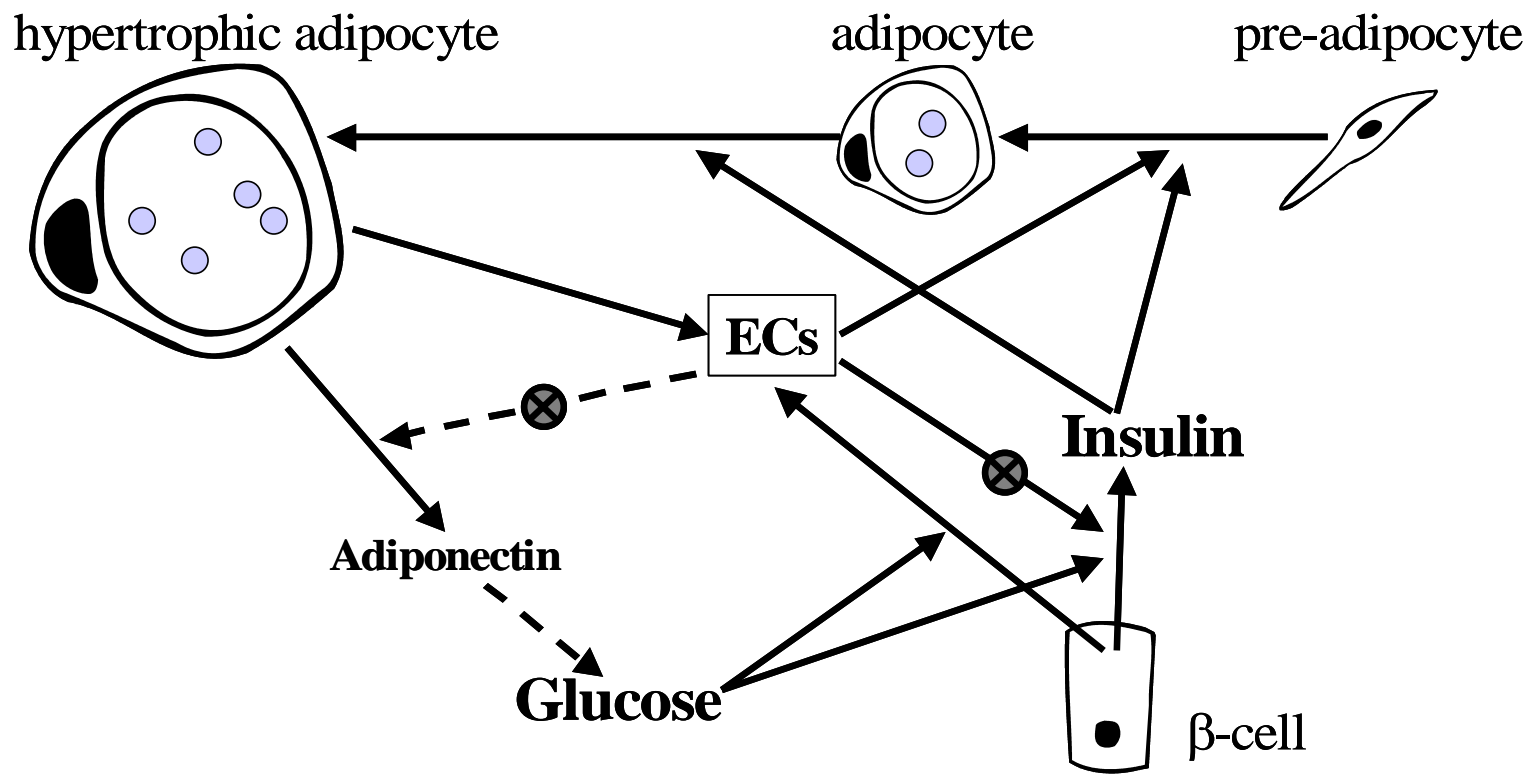

Supplement: 1.document1.pdf [file 1.document1.pdf]
